# Supplementary material for: Development and Characterization of a Rapid-Disintegrating Film of Olanzapine for Sublingual Delivery
Source: Research Square preprint supplement (doi:10.21203/rs.3.rs-6314838/v1), 2025-04-21
Supplement: Supplementary file 1 [file 157bfdf828a6cbdb1d9c9e92.docx]

Table 3. Assignment of risk priority number for CPPs of OLZ Sublingual film

| **CPPs** | **S** | **O** | **Major critical factors and control strategy** | **D** | **RPN** |
| --- | --- | --- | --- | --- | --- |
| Mixing time effect on physical attributes that is the size and mechanical properties of the film. | 5 | 1 | Insufficient mixing time of drug and other excipients may result non-uniformity of drug content. This depends on the particle size of the drug and other characteristics. | 1 | 15 |
| Mixing time effect on assay. | 5 | 3 | Difference in drug content may occur if uniform mixing not done. | 1 | 15 |
| Mixing time effect on in-vitro drug release | 5 | 5 | Mixing time and speed should ensure uniformity of drug distribution, required disintegration and dissolution of drug. | 3 | 75 |
| Effect of film casting parameter i.e., glass plate size on invitro drug release. | 5 | 1 | Variation in size and thickness of film due to uneven pouring of the solution on the glass plate. Size of the glass plate also to be kept similar for every batch of film. | 3 | 15 |
| Effect of film casting parameters i.e., glass plate size on assay and disintegration time | 3 | 3 | Suitable amount of solution mixture is to be poured on the glass dish for each batch this will also be essential for thickness of the film any thus may also affect the disintegration of the film. | 3 | 27 |
| Effect of drying temperature on physical attributes | 5 | 3 | The film may find difficult to solubilize, change in disintegration time. Increase in temperature will make the film more brittle. To maintain standard temperature and drying condition is a control strategy for this. | 1 | 15 |
| Effect of drying temperature and time on in-vitro drug release | 3 | 1 | Due to hardness or softness of the film caused by change in drying condition may result in changes in invitro drug release. The film if brittle may also change the release of drug. | 3 | 9 |
| Effect of drying temperature on disintegration time | 5 | 3 | The drying condition may affect the hardness of the film this will result in more time of disintegration of the film | 3 | 15 |
| Effect of drying time on physical attributes | 5 | 3 | The longer duration of time for drying will increase the brittleness of the film. | 1 | 15 |
| Effect of drying time on In-vitro drug release | 5 | 3 | Due to hardness the film may find difficult to release the drug in as fast dissolving film | 3 | 45 |
| Effect of cooling and cutting parameters on physical attributes | 5 | 3 | Proper cutting of the film will result in accuracy in the size and shape of the film. Cooling parameter will determine the elasticity and tensile strength | 1 | 15 |
