# Supplementary material for: Development and Characterization of a Rapid-Disintegrating Film of Olanzapine for Sublingual Delivery
Source: Research Square preprint supplement (doi:10.21203/rs.3.rs-6314838/v1), 2025-04-21
Supplement: Supplementary file 2 [file 32b7327082691e432beb8a59.docx]

Table 1. QTPP parameters for olanzapine sublingual film

| **QTPP** | **Target** | **Justification** |
| --- | --- | --- |
| Dosage form | Sublingual  film | The sublingual film will bypass the first pass metabolism of liver, thus increase bioavailability of drug. |
| Drug content | 90-95% | The amount of olanzapine present in each unit of the sublingual film is a critical parameter. Ensuring consistent drug content is essential for accurate dosing and therapeutic efficacy. |
| Stability | 12 months | The stability of the sublingual film over its shelf life is vital to ensure that the drug retains its potency and quality throughout its intended use period. |
| Dosage strength | 5-10mg | Dosage strength can be controlled by adding fixed amount of drug dose. |
| Type of sublingual film | Fast dissolving film | It should be fast dissolving for ease in disintegration. To attain minimum disintegration time. |
