# Supplementary material for: Development and Characterization of a Rapid-Disintegrating Film of Olanzapine for Sublingual Delivery
Source: Research Square preprint supplement (doi:10.21203/rs.3.rs-6314838/v1), 2025-04-21
Supplement: Supplementary file 3 [file 3c9daf8086f122f675fcd32a.docx]

Table 2 CQA parameters for olanzapine sublingual film

| **CQA** | **Target** | **Justification** |
| --- | --- | --- |
| Weight variation | Length, width, and thickness that render the film convenient for placement under the tongue. The size of film is 2 cm×2 cm and weight in range 30 ± 50 mg. | Important to obtain desired sublingual film with appropriate characteristics. |
| Thickness | High tensile strength, high elongation at break, and low Young’s modulus | Important to form idea film formulation with desired properties. |
| Disintegration time | Not more than 120 s | Disintegration time should be minimum |
| Content uniformity | < 90% | Accurate amount of drug content will ensure desired pharmacological effect from the film. minimum |
| Assay | More than 95% | It helps ensure that the strength of a therapeutic product remains within specified acceptance limits |
