# Supplementary material for: Development and Characterization of a Rapid-Disintegrating Film of Olanzapine for Sublingual Delivery
Source: Research Square preprint supplement (doi:10.21203/rs.3.rs-6314838/v1), 2025-04-21
Supplement: Supplementary file 4 [file 41bc796f2c38d616e11f344e.docx]

Table 6. Independent factors and their levels for the fractional factorial design of OLZ sublingual film

| **Factors** | **Level** | |
| --- | --- | --- |
| **High** | **Low** |
| Drying Time | 24hrs | 8hrs |
| Glass Plate Size | 7.5 cm | 9 cm |
| Polymer type | HPMC E5 | HPMC 5cPs |
| Polymer concentration (HPMC) | (4% w/v) | (6% w/v) |
| Surfactant concentration (Transcutol HP) | (2% v/v) | (6% v/v) |
| Plasticizer (PEG 400) | (2% v/v) | (7% v/v) |
