# Supplementary material for: Development and Characterization of a Rapid-Disintegrating Film of Olanzapine for Sublingual Delivery
Source: Research Square preprint supplement (doi:10.21203/rs.3.rs-6314838/v1), 2025-04-21
Supplement: Supplementary file 5 [file 5898deb1c09fd5d493b6d013.docx]

Table 7. Formulation variables and their responses using fractional factorial design.

| **Std** | **Run** | **Glass plate size (cm)** | **Drying time (Hours)** | **Polymer type** | **Polymer conc (W/V%)** | **Surfactant conc (V/V%)** | **Plasticizer (V/V%)** | **Thickness (mm)** | **Disintegration time (sec)** | **Content uniformity (relative Std. dev)** | **Weight variation (mm)** |
| --- | --- | --- | --- | --- | --- | --- | --- | --- | --- | --- | --- |
| 1 | 8 | 7.5 | 8 | HPMC E5 | 3 | 2 | 2 | 0.15 | 17 | 71.75 | 52 |
| 2 | 31 | 9 | 8 | HPMC E5 | 3 | 2 | 7 | 0.12 | 15 | 63.18 | 45 |
| 3 | 17 | 7.5 | 24 | HPMC E5 | 3 | 2 | 7 | 0.14 | 19 | 2.32 | 42 |
| 4 | 3 | 9 | 24 | HPMC E5 | 3 | 2 | 2 | -- | -- | -- | -- |
| 5 | 15 | 7.5 | 8 | HPMC 50cPs | 3 | 2 | 7 | 0.14 | 17 | 47.3 | 50 |
| 6 | 13 | 9 | 8 | HPMC 50cPs | 3 | 2 | 2 | -- | -- | -- | -- |
| 7 | 30 | 7.5 | 24 | HPMC 50cPs | 3 | 2 | 2 | -- | -- | -- | -- |
| 8 | 21 | 9 | 24 | HPMC 50cPs | 3 | 2 | 7 | -- | -- | -- | -- |
| 9 | 19 | 7.5 | 8 | HPMC E5 | 6 | 2 | 7 | 0.38 | 21 | 34.52 | 74 |
| 10 | 4 | 9 | 8 | HPMC E5 | 6 | 2 | 2 | 0.17 | 17 | 74.46 | 51 |
| 11 | 23 | 7.5 | 24 | HPMC E5 | 6 | 2 | 2 | 0.12 | 24 | 9 | 51 |
| 12 | 12 | 9 | 24 | HPMC E5 | 6 | 2 | 7 | 0.35 | 18 | 79.09 | 66 |
| 13 | 32 | 7.5 | 8 | HPMC 50cPs | 6 | 2 | 2 | 0.15 | 19 | 27.75 | 52 |
| 14 | 24 | 9 | 8 | HPMC 50cPs | 6 | 2 | 7 | 0.24 | 20 | 34.97 | 46 |
| 15 | 2 | 7.5 | 24 | HPMC 50cPs | 6 | 2 | 7 | 0.13 | 23 | 83.42 | 58 |
| 16 | 28 | 9 | 24 | HPMC 50cPs | 6 | 2 | 2 | 0.18 | 22 | 35.88 | 58 |
| 17 | 18 | 7.5 | 8 | HPMC E5 | 3 | 6 | 7 | 0.17 | 15 | 22.79 | 47 |
| 18 | 6 | 9 | 8 | HPMC E5 | 3 | 6 | 2 | 0.16 | 12 | 32.49 | 57 |
| 19 | 7 | 7.5 | 24 | HPMC E5 | 3 | 6 | 2 | 0.25 | 16 | 17.37 | 46 |
| 20 | 20 | 9 | 24 | HPMC E5 | 3 | 6 | 7 | 0.18 | 13 | 9.7 | 49 |
| 21 | 25 | 7.5 | 8 | HPMC 50cPs | 3 | 6 | 2 | 0.23 | 18 | 33.17 | 41 |
| 22 | 22 | 9 | 8 | HPMC 50cPs | 3 | 6 | 7 | -- | -- | -- | -- |
| 23 | 11 | 7.5 | 24 | HPMC 50cPs | 3 | 6 | 7 | 0.17 | 16 | 18.05 | 44 |
| 24 | 16 | 9 | 24 | HPMC 50cPs | 3 | 6 | 2 | -- | -- | -- | -- |
| 25 | 1 | 7.5 | 8 | HPMC E5 | 6 | 6 | 2 | 0.22 | 24 | 78.3 | 75 |
| 26 | 29 | 9 | 8 | HPMC E5 | 6 | 6 | 7 | 0.25 | 18 | 4.42 | 67 |
| 27 | 5 | 7.5 | 24 | HPMC E5 | 6 | 6 | 7 | 0.18 | 21 | 129.74 | 67 |
| 28 | 9 | 9 | 24 | HPMC E5 | 6 | 6 | 2 | 0.29 | 22 | 44.45 | 75 |
| 29 | 27 | 7.5 | 8 | HPMC 50cPs | 6 | 6 | 7 | 0.29 | 27 | 61.83 | 83 |
| 30 | 10 | 9 | 8 | HPMC 50cPs | 6 | 6 | 2 | 0.12 | 20 | 49.64 | 58 |
| 31 | 26 | 7.5 | 24 | HPMC 50cPs | 6 | 6 | 2 | 0.25 | 21 | 4.13 | 68 |
| 32 | 14 | 9 | 24 | HPMC 50cPs | 6 | 6 | 7 | 0.22 | 23 | 22.34 | 71 |
