# Supplementary material for: Development and Characterization of a Rapid-Disintegrating Film of Olanzapine for Sublingual Delivery
Source: Research Square preprint supplement (doi:10.21203/rs.3.rs-6314838/v1), 2025-04-21
Supplement: Supplementary file 6 [file 6217c616c4822e995608f501.docx]

Table 8.Box-Behnken Design of three levels and three factors

| **Levels (3)** | **Independent variables** | | | |
| --- | --- | --- | --- | --- |
| **Polymer Conc**  **%(w/v)** | **Surfactant Conc**  **%(v/v)** | | **Plasticizer Conc**  **%(v/v)** |
| **Low (-1)** | 4 | 4 | | 3 |
| **Medium (0)** | 5 | 5 | | 4 |
| **High (+1)** | 6 | 6 | | 5 |
| **Responses** | **Dependent Variables** | | | |
| **Weight variation** | **Disintegration time** | **Content Uniformity** | **Assay** |
