# Supplementary material for: Development and Characterization of a Rapid-Disintegrating Film of Olanzapine for Sublingual Delivery
Source: Research Square preprint supplement (doi:10.21203/rs.3.rs-6314838/v1), 2025-04-21
Supplement: Supplementary file 7 [file 69e8a02859e1207b3daa6c6c.docx]

Table 5. Risk assessment of CMA & CPP based on assigned RPN

| **Responses** | **Risk exhibiting experimental variables** | | | | | | |
| --- | --- | --- | --- | --- | --- | --- | --- |
| CQAs | Conc of HPMC E5 | Conc of HPMC 50cPs | Transcutol HP | PEG 400 | Citric acid | Water | Environment  condition |
| Weight variation | H | H | M | M | L | L | L |
| Thickness | H | H | M | L | L | L | L |
| Disintegration time | H | H | M | H | L | M | M |
| Content uniformity | L | L | M | L | M | L | H |
| Assay | M | M | L | L | M | L | H |
| Folding endurance | H | H | M | L | L | M | M |
