# Supplementary material for: Development and Characterization of a Rapid-Disintegrating Film of Olanzapine for Sublingual Delivery
Source: Research Square preprint supplement (doi:10.21203/rs.3.rs-6314838/v1), 2025-04-21
Supplement: Supplementary file 8 [file c6c4759f2c56f91df4c48e79.docx]

Table 10 ANOVA for response measurement of Content uniformity, disintegration time, thickness, assay, weight variation.

| **Source** | **Sum of squares** | **df** | **Mean square** | **F-value** | **p-value** |  |
| --- | --- | --- | --- | --- | --- | --- |
| **Content uniformity** |  |  |  |  |  |  |
| **Quadratic model** | 3128.84 | 9 | 347.65 | 19.11 | 0.0023 | significant |
| **Residual** | 90.98 | 5 | 18.20 |  |  |  |
| **Cor Total** | 3219.82 | 14 |  |  |  |  |
| **Disintegration time** |  |  |  |  |  |  |
| **Quadratic model** | 0.0006 | 9 | 0.0001 | 7.41 | 0.0075 | significant |
| **Residual** | 0.0001 | 7 | 9.124E-06 |  |  |  |
| **Cor Total** | 0.0007 | 16 |  |  |  |  |
| **Thickness** |  |  |  |  |  |  |
| **Modified model** | 31024.84 | 3 | 10341.61 | 4.39 | 0.0243 | significant |
| **Residual** | 30622.22 | 13 | 2355.56 |  |  |  |
| **Cor Total** | 61647.06 | 16 |  |  |  |  |
| **Assay** |  |  |  |  |  |  |
| **Linear model** | 6858.71 | 3 | 2286.24 | 6.62 | 0.0097 | significant |
| **Residual** | 3453.04 | 10 | 345.30 |  |  |  |
| **Cor Total** | 10311.76 | 13 |  |  |  |  |
| **Weight variation** |  |  |  |  |  |  |
| **Linear model** | 3752.71 | 3 | 1250.90 | 6.37 | 0.0069 | significant |
| **Residual** | 2553.53 | 13 | 196.43 |  |  |  |
| **Cor Total** | 6306.24 | 16 |  |  |  |  |
