# Supplementary material for: Development and Characterization of a Rapid-Disintegrating Film of Olanzapine for Sublingual Delivery
Source: Research Square preprint supplement (doi:10.21203/rs.3.rs-6314838/v1), 2025-04-21
Supplement: Supplementary file 9 [file dcd8d6dcb1de8674930a6ad0.docx]

Table 4. Assignment of risk priority number for CMAs of OLZ Sublingual film

| **CMA’s** | **S** | **O** | **Major critical factors and control strategy** | **D** | **RPN** |
| --- | --- | --- | --- | --- | --- |
| Effect of API characteristics on the physical attributes i.e., the size, shape and thickness of the film | 5 | 3 | Maximum area of the film should be available for drug absorption. Uniformity in size and shape of the sublingual film is essential to ensure consistent dosing. Mechanical properties of the film, such as flexibility and brittleness, can affect the handling and administration of the film. A brittle film may be more prone to breakage during handling, potentially affecting API release. | 3 | 45 |
| Effect of API characteristics on In-vitro drug release | 5 | 5 | The particle size, zeta potential, solubility of the API in the solvent is essential in formulating sublingual film. | 3 | 75 |
| Effect of polymer on content uniformity | 5 | 3 | The highest degree of content uniformity can be reached if the shape, size and density of mixed particles are as similar as possible | 3 | 45 |
| Effect of polymer on Invitro drug release | 5 | 5 | High affinity of the drug to the polymer may result in delayed release. The thickness obtained after pouring in glass plate may also affect the invitro drug release. To use specific grade of polymer and concentration, amount of polymer is the only control strategy. | 3 | 75 |
| Effect of surfactant on content uniformity | 5 | 3 | The drug will have ease in spread ability in the sublingual film. | 1 | 15 |
