# Supplementary material for: Development and Characterization of a Rapid-Disintegrating Film of Olanzapine for Sublingual Delivery
Source: Research Square preprint supplement (doi:10.21203/rs.3.rs-6314838/v1), 2025-04-21
Supplement: Supplementary file 10 [file fc10f27ec030157d9fb2352f.docx]

Table 9. Formulation variables and their responses using Box-Behnken Design

|  | **Factor 1** | **Factor 2** | **Factor 3** | **Response 1** | **Response 2** | **Response 3** | **Response 4** | **Response 5** |
| --- | --- | --- | --- | --- | --- | --- | --- | --- |
| **Run** | **A: Polymer** | **B: Surfactant** | **C: Plasticizer** | **Weight variation** | **Thickness** | **Disintegration time** | **Content uniformity** | **Assay** |
| **Units** | **%** | **%** | **%** | **mg** | **mm** | **sec** | **%** | **%** |
| 1 | 4 | 4 | 4 | 61.8 | 170 | 10 | 49.1701 | 50.4143 |
| 2 | 5 | 5 | 4 | 100.8 | 350 | 13 | 64.4516 | 54.297 |
| 3 | 5 | 5 | 4 | 97 | 260 | 22 | 19.2918 | 92.4322 |
| 4 | 5 | 5 | 4 | 71.5 | 260 | 17 | 24.5692 | 138.502 |
| 5 | 6 | 5 | 3 | 92.4 | 230 | 25 | 27.0886 | 163.379 |
| 6 | 5 | 5 | 4 | 83.7 | 130 | 15 | 19.7539 | 94.1056 |
| 7 | 4 | 5 | 3 | 31.6 | 150 | 12 | 72.5276 | 75.2318 |
| 8 | 5 | 4 | 3 | 43.2 | 270 | 10 | 36.4516 | 18.6893 |
| 9 | 4 | 5 | 5 | 95 | 150 | 15 | 15.8078 | 64.1861 |
| 10 | 6 | 4 | 4 | 73.4 | 150 | 10 | 30.0882 | 48.9903 |
| 11 | 5 | 5 | 4 | 97 | 260 | 20 | 21.9984 | 61.6095 |
| 12 | 5 | 6 | 3 | 85.3 | 300 | 20 | 22.5726 | 88.8356 |
| 13 | 6 | 5 | 5 | 100.3 | 290 | 12 | 34.1597 | 101.719 |
| 14 | 4 | 6 | 4 | 78.8 | 270 | 9 | 23.8258 | 65.7348 |
| 15 | 5 | 4 | 5 | 86.8 | 230 | 14 | 21.9215 | 124.165 |
| 16 | 5 | 6 | 5 | 95 | 240 | 12 | 14.4969 | 99.6685 |
| 17 | 6 | 6 | 4 | 88.7 | 230 | 15 | 17.6851 | 128.559 |
